# Supplementary material for: Transition from CSII to Second-Generation Basal Insulin Analogues in Hospitalized T2DM Patients: A CGM-Based Study
Source: Research Square preprint supplement (doi:10.21203/rs.3.rs-8712412/v1), 2026-02-09
Supplement: Supplementary file 1 [file 274fc1f40050e44dc6229852.docx]

**Supplementary Table 1 Correlation between CGM metrics and clinical characteristics during CSII period and after transition**

| **Items** | **Group** | **Value** | **Gender（1=M, 2=F）** | **Age** | **BMI** | **Duration** | **Ketosis** | **HbA1c** | **eGFR** | **Albumin** |
| --- | --- | --- | --- | --- | --- | --- | --- | --- | --- | --- |
| GMI | CSII | r | 0.002 | 0.105 | -0.165 | -0.019 | -0.046 | 0.228 | 0.005 | -0.142 |
| *P* | 0.981 | 0.228 | 0.058 | 0.832 | 0.596 | **0.011** | 0.951 | 0.121 |
| IDeg | r | 0.038 | 0.236 | -0.350 | 0.316 | -0.044 | 0.252 | 0.035 | -0.228 |
| *P* | 0.745 | **0.039** | **0.002** | **0.005** | 0.707 | **0.038** | 0.772 | 0.062 |
| IGlar U300 | r | 0.111 | 0.332 | -0.538 | 0.481 | -0.085 | -0.127 | -0.008 | -0.316 |
| *P* | 0.408 | **0.011** | **<0.001** | **<0.001** | 0.524 | 0.356 | 0.957 | **0.021** |
| MG | CSII | r | 0.002 | 0.105 | -0.165 | -0.019 | -0.046 | 0.228 | 0.005 | -0.142 |
| *P* | 0.981 | 0.228 | 0.058 | 0.832 | 0.596 | **0.011** | 0.951 | 0.121 |
| IDeg | r | 0.038 | 0.236 | -0.350 | 0.316 | -0.044 | 0.252 | 0.035 | -0.228 |
| *P* | 0.745 | **0.039** | **0.002** | **0.005** | 0.707 | **0.038** | 0.772 | 0.062 |
| IGlar U300 | r | 0.111 | 0.332 | -0.538 | 0.481 | -0.085 | -0.127 | -0.008 | -0.316 |
| *P* | 0.408 | **0.011** | **<0.001** | **<0.001** | 0.524 | 0.356 | 0.957 | **0.021** |
| %TIR (3.9–10.0 mmol/L) | CSII | r | -0.031 | -0.103 | 0.194 | -0.024 | 0.040 | -0.212 | 0.023 | 0.196 |
| *P* | 0.717 | 0.235 | **0.025** | 0.480 | 0.643 | **0.018** | 0.801 | **0.031** |
| IDeg | r | 0.012 | -0.226 | 0.423 | -0.288 | 0.000 | -0.269 | -0.059 | 0.270 |
| *P* | 0.916 | **0.048** | **<0.001** | **0.011** | 1.000 | **0.026** | 0.621 | **0.026** |
| IGlar U300 | r | -0.096 | -0.246 | 0.551 | -0.490 | -0.070 | 0.203 | -0.010 | 0.311 |
| *P* | 0.475 | 0.063 | **<0.001** | **<0.001** | 0.604 | 0.138 | 0.945 | **0.024** |

**Supplementary Table 1 continued**

| **Items** | **Group** |  | **Gender（1=M, 2=F）** | **Age** | **BMI** | **Duration** | **Ketosis** | **HbA1c** | **eGFR** | **Albumin** |
| --- | --- | --- | --- | --- | --- | --- | --- | --- | --- | --- |
| %TITR (3.9–7.8 mmol/L) | CSII | r | -0.061 | -0.136 | 0.109 | -0.070 | 0.057 | -0.150 | 0.005 | 0.135 |
| *P* | 0.482 | 0.116 | 0.210 | 0.425 | 0.514 | 0.097 | 0.953 | 0.141 |
| IDeg | r | -0.125 | -0.163 | 0.265 | -0.367 | 0.061 | -0.262 | -0.032 | 0.222 |
|  | *P* | 0.278 | 0.157 | **0.021** | **0.001** | 0.598 | **0.031** | 0.791 | 0.069 |
| IGlar U300 | r | -0.175 | -0.369 | 0.503 | -0.571 | 0.066 | 0.153 | -0.002 | 0.320 |
|  | *P* | 0.189 | **0.004** | **0.000** | **<0.001** | 0.620 | 0.264 | 0.987 | **0.019** |
| %TAR (>10.0 mmol/L) | CSII | r | 0.026 | 0.128 | -0.177 | 0.011 | -0.036 | 0.219 | -0.008 | -0.173 |
| *P* | 0.762 | 0.139 | **0.041** | 0.903 | 0.675 | **0.015** | 0.932 | 0.057 |
| IDeg | r | 0.011 | 0.241 | -0.415 | 0.294 | -0.009 | 0.247 | 0.048 | -0.260 |
| *P* | 0.925 | **0.035** | **<0.001** | **0.009** | 0.940 | **0.042** | 0.685 | **0.032** |
| IGlar U300 | r | 0.081 | 0.274 | -0.568 | 0.492 | -0.070 | -0.183 | 0.002 | -0.320 |
| *P* | 0.547 | **0.038** | **<0.001** | **<0.001** | 0.604 | 0.182 | 0.989 | **0.019** |
| %TBR (<3.9 mmol/L) | IDeg | r | -0.045 | 0.167 | -0.351 | 0.056 | 0.236 | 0.058 | -0.156 | -0.199 |
| *P* | 0.697 | 0.146 | **0.002** | 0.627 | **0.039** | 0.639 | 0.187 | 0.103 |
| IGlar U300 | r | 0.211 | -0.328 | -0.020 | -0.076 | 0.098 | 0.017 | 0.216 | 0.228 |
| *P* | 0.111 | **0.012** | 0.884 | 0.576 | 0.466 | 0.902 | 0.113 | 0.100 |
| LBGI | CSII | r | 0.042 | 0.175 | -0.288 | 0.253 | 0.053 | -0.007 | -0.266 | -0.260 |
| *P* | 0.629 | **0.042** | **0.001** | **0.003** | 0.545 | 0.937 | **0.002** | **0.004** |

**Supplementary Table 1 continued**

| **Items** | **Group** |  | **Gender（1=M, 2=F）** | **Age** | **BMI** | **Duration** | **Ketosis** | **HbA1c** | **eGFR** | **Albumin** |
| --- | --- | --- | --- | --- | --- | --- | --- | --- | --- | --- |
| LBGI | IDeg | r | -0.023 | 0.158 | -0.379 | 0.077 | 0.227 | 0.027 | -0.174 | -0.206 |
| *P* | 0.842 | 0.170 | **0.001** | 0.507 | **0.047** | 0.825 | 0.141 | 0.092 |
| IGlar U300 | r | 0.235 | -0.247 | -0.100 | -0.063 | -0.006 | -0.034 | 0.129 | 0.056 |
| *P* | 0.076 | 0.061 | 0.460 | 0.643 | 0.962 | 0.804 | 0.347 | 0.689 |
| HBGI | CSII | r | -0.031 | 0.128 | -0.245 | -0.037 | 0.003 | 0.249 | -0.018 | -0.202 |
| *P* | 0.885 | 0.140 | **0.004** | 0.675 | 0.973 | **0.006** | 0.844 | **0.026** |
| IDeg | r | -0.024 | 0.248 | -0.511 | 0.295 | -0.013 | 0.222 | 0.040 | -0.270 |
| *P* | 0.834 | **0.030** | **<0.001** | **0.009** | 0.910 | 0.069 | 0.739 | **0.026** |
| IGlar U300 | r | 0.088 | 0.270 | -0.601 | 0.461 | -0.028 | -0.203 | 0.003 | -0.341 |
| *P* | 0.513 | **0.041** | **<0.001** | **<0.001** | 0.832 | 0.138 | 0.982 | **0.012** |
| CV (%) | CSII | r | -0.093 | 0.126 | -0.312 | -0.062 | 0.082 | 0.142 | -0.101 | -0.159 |
| *P* | 0.283 | 0.145 | **<0.001** | 0.480 | 0.342 | 0.117 | 0.256 | 0.082 |
| IDeg | r | -0.055 | 0.295 | -0.588 | 0.147 | 0.170 | 0.067 | -0.095 | -0.285 |
| *P* | 0.637 | **0.009** | **<0.001** | 0.203 | 0.139 | 0.587 | 0.424 | **0.018** |
| IGlar U300 | r | 0.046 | 0.006 | -0.328 | 0.033 | 0.139 | 0.144 | 0.058 | -0.259 |
| *P* | 0.731 | 0.961 | **0.013** | 0.809 | 0.298 | 0.293 | 0.673 | 0.061 |
| CVnight (%) | CSII | r | -0.118 | 0.167 | -0.157 | 0.036 | 0.088 | 0.095 | -0.155 | -0.238 |
| *P* | 0.174 | 0.052 | 0.071 | 0.679 | 0.310 | 0.295 | 0.081 | **0.009** |

**Supplementary Table 1 continued**

| **Items** | **Group** |  | **Gender（1=M, 2=F）** | **Age** | **BMI** | **Duration** | **Ketosis** | **HbA1c** | **eGFR** | **Albumin** |
| --- | --- | --- | --- | --- | --- | --- | --- | --- | --- | --- |
| CVnight (%) | IDeg | r | 0.030 | 0.306 | -0.393 | 0.081 | 0.277 | 0.034 | -0.163 | -0.333 |
| *P* | 0.797 | **0.007** | **<0.001** | 0.481 | **0.015** | 0.785 | 0.169 | **0.006** |
| IGlar U300 | r | 0.290 | 0.017 | -0.308 | 0.183 | -0.060 | 0.109 | -0.076 | -0.367 |
| *P* | **0.027** | 0.899 | **0.020** | 0.176 | 0.654 | 0.429 | 0.579 | **0.007** |
| MODD | CSII | r | -0.027 | 0.185 | -0.358 | 0.076 | 0.017 | 0.210 | -0.078 | -0.333 |
| *P* | 0.753 | **0.032** | **<0.001** | 0.384 | 0.841 | **0.020** | 0.381 | **<0.001** |
| IDeg | r | 0.009 | 0.264 | -0.550 | 0.298 | 0.054 | 0.214 | 0.011 | -0.406 |
| *P* | 0.941 | **0.020** | **<0.001** | **0.009** | 0.638 | 0.080 | 0.925 | **0.001** |
| IGlar U300 | r | 0.069 | 0.120 | -0.470 | 0.329 | -0.009 | -0.026 | -0.034 | -0.340 |
| *P* | 0.606 | 0.368 | **<0.001** | **0.013** | 0.944 | 0.849 | 0.807 | **0.012** |
| CVFBS (%) | CSII | r | -0.067 | 0.186 | -0.051 | -0.013 | 0.107 | 0.176 | -0.070 | -0.156 |
| *P* | 0.441 | **0.031** | 0.561 | 0.881 | 0.216 | 0.052 | 0.433 | 0.087 |
| IDeg | r | -0.069 | 0.217 | -0.415 | 0.202 | 0.068 | -0.008 | -0.090 | -0.141 |
| *P* | 0.55 | 0.058 | **<0.001** | 0.078 | 0.559 | 0.947 | 0.447 | 0.253 |
| IGlar U300 | r | 0.154 | -0.037 | -0.381 | 0.067 | 0.174 | 0.018 | 0.063 | -0.245 |
| *P* | 0.247 | 0.785 | **0.003** | 0.622 | 0.192 | 0.895 | 0.648 | 0.077 |

CGM, continuous glucose monitoring; CSII, continuous subcutaneous insulin infusion; BMI, body mass index; HbA1c, glycosylated haemoglobin; eGFR, estimated glomerular filtration rate; GMI, glucose management indicator; MG, mean glucose; TIR, time in range; TITR, time in tight range; TAR, time above range; TBR, time below range; LBGI, low blood glucose index; HBGI, high blood glucose index; CV, coefficient of variation; CVnight, coefficient of variation from 0000 h to 0600 h; MODD, mean of daily difference; CVFBS, coefficient of variation of fasting blood sugar.
